# Supplementary material for: Anticancer Agent Shikonin Is an Incompetent Inducer of Cancer Drug Resistance
Source: PubMed Central journal article supplement (PMC3536779; doi:10.1371/journal.pone.0052706), 2013-01-03
Supplement: pone.0052706.s003.pdf [file pone.0052706.s003.pdf]

Table S3: The common gene ontology terms of up regulated genes in K562/Shk cells. Cells were treated with shikonin for 18 months, control cells were treated with vehicle as described in Materials and Methods.

| GO ID                     | GO Term                                                   | Count | PValue | Fold Enrichment |
|---------------------------|-----------------------------------------------------------|-------|--------|-----------------|
| <b>Biological Process</b> |                                                           |       |        |                 |
| GO:0042127                | regulation of cell proliferation                          | 24    | 0.0128 | 1.7118          |
| GO:0043067                | regulation of programmed cell death                       | 24    | 0.0179 | 1.6591          |
| GO:0010941                | regulation of cell death                                  | 24    | 0.0186 | 1.6530          |
| GO:0042981                | regulation of apoptosis                                   | 23    | 0.0287 | 1.6058          |
| GO:0010033                | response to organic substance                             | 22    | 0.0177 | 1.7128          |
| GO:0055114                | oxidation reduction                                       | 21    | 0.0100 | 1.8447          |
| GO:0042592                | homeostatic process                                       | 21    | 0.0456 | 1.5696          |
| GO:0007267                | cell-cell signaling                                       | 20    | 0.0106 | 1.8711          |
| GO:0007049                | cell cycle                                                | 20    | 0.0965 | 1.4467          |
| GO:0031328                | positive regulation of cellular biosynthetic process      | 19    | 0.0625 | 1.5570          |
| GO:0009891                | positive regulation of biosynthetic process               | 19    | 0.0697 | 1.5346          |
| GO:0009611                | response to wounding                                      | 18    | 0.0133 | 1.9064          |
| GO:0010557                | positive regulation of macromolecule biosynthetic process | 18    | 0.0746 | 1.5449          |
| GO:0009719                | response to endogenous stimulus                           | 16    | 0.0058 | 2.2176          |
| GO:0007167                | enzyme linked receptor protein signaling pathway          | 15    | 0.0032 | 2.4620          |
| GO:0030030                | cell projection organization                              | 15    | 0.0061 | 2.2880          |
| GO:0030182                | neuron differentiation                                    | 15    | 0.0249 | 1.9224          |
| GO:0042325                | regulation of phosphorylation                             | 15    | 0.0386 | 1.8068          |
| GO:0051174                | regulation of phosphorus metabolic process                | 15    | 0.0507 | 1.7361          |
| GO:0019220                | regulation of phosphate metabolic process                 | 15    | 0.0507 | 1.7361          |
| GO:0001944                | vasculature development                                   | 14    | 0.0006 | 3.1309          |
| GO:0001775                | cell activation                                           | 14    | 0.0019 | 2.7382          |
| GO:0009725                | response to hormone stimulus                              | 14    | 0.0140 | 2.1413          |
| GO:0051338                | regulation of transferase activity                        | 14    | 0.0156 | 2.1125          |
| GO:0008284                | positive regulation of cell proliferation                 | 14    | 0.0333 | 1.8982          |
| GO:0001568                | blood vessel development                                  | 13    | 0.0014 | 2.9785          |
| GO:0043549                | regulation of kinase activity                             | 13    | 0.0257 | 2.0441          |
| GO:0043069                | negative regulation of programmed cell death              | 13    | 0.0266 | 2.0327          |
| GO:0060548                | negative regulation of cell death                         | 13    | 0.0274 | 2.0270          |

Table S3: Continued

| GO ID      | GO Term                                                          | Count | PValue | Fold Enrichment |
|------------|------------------------------------------------------------------|-------|--------|-----------------|
| GO:0043068 | positive regulation of programmed cell death                     | 13    | 0.0850 | 1.6853          |
| GO:0010942 | positive regulation of cell death                                | 13    | 0.0873 | 1.6775          |
| GO:0007010 | cytoskeleton organization                                        | 13    | 0.0885 | 1.6737          |
| GO:0044092 | negative regulation of molecular function                        | 12    | 0.0363 | 2.0167          |
| GO:0048666 | neuron development                                               | 12    | 0.0397 | 1.9870          |
| GO:0045859 | regulation of protein kinase activity                            | 12    | 0.0441 | 1.9524          |
| GO:0043066 | negative regulation of apoptosis                                 | 12    | 0.0514 | 1.9028          |
| GO:0032989 | cellular component morphogenesis                                 | 12    | 0.0969 | 1.6967          |
| GO:0010035 | response to inorganic substance                                  | 11    | 0.0036 | 3.0120          |
| GO:0031175 | neuron projection development                                    | 11    | 0.0161 | 2.4120          |
| GO:0003006 | reproductive developmental process                               | 11    | 0.0187 | 2.3567          |
| GO:0019226 | transmission of nerve impulse                                    | 11    | 0.0943 | 1.7642          |
| GO:0009991 | response to extracellular stimulus                               | 10    | 0.0167 | 2.5515          |
| GO:0048584 | positive regulation of response to stimulus                      | 10    | 0.0251 | 2.3785          |
| GO:0045321 | leukocyte activation                                             | 10    | 0.0289 | 2.3195          |
| GO:0000904 | cell morphogenesis involved in differentiation                   | 10    | 0.0298 | 2.3005          |
| GO:0060341 | regulation of cellular localization                              | 10    | 0.0330 | 2.2634          |
| GO:0043086 | negative regulation of catalytic activity                        | 10    | 0.0590 | 2.0265          |
| GO:0051094 | positive regulation of developmental process                     | 10    | 0.0601 | 2.0192          |
| GO:0042060 | wound healing                                                    | 9     | 0.0206 | 2.6450          |
| GO:0048545 | response to steroid hormone stimulus                             | 9     | 0.0213 | 2.6312          |
| GO:0019637 | organophosphate metabolic process                                | 9     | 0.0263 | 2.5260          |
| GO:0048514 | blood vessel morphogenesis                                       | 9     | 0.0346 | 2.3943          |
| GO:0033043 | regulation of organelle organization                             | 9     | 0.0398 | 2.3281          |
| GO:0007169 | transmembrane receptor protein tyrosine kinase signaling pathway | 9     | 0.0466 | 2.2553          |
| GO:0048858 | cell projection morphogenesis                                    | 9     | 0.0709 | 2.0620          |
| GO:0032990 | cell part morphogenesis                                          | 9     | 0.0862 | 1.9734          |
| GO:0007584 | response to nutrient                                             | 8     | 0.0124 | 3.2076          |
| GO:0046942 | carboxylic acid transport                                        | 8     | 0.0159 | 3.0548          |
| GO:0015849 | organic acid transport                                           | 8     | 0.0164 | 3.0342          |
| GO:0007548 | sex differentiation                                              | 8     | 0.0181 | 2.9739          |
| GO:0006644 | phospholipid metabolic process                                   | 8     | 0.0527 | 2.3635          |
| GO:0040012 | regulation of locomotion                                         | 8     | 0.0552 | 2.3389          |

Table S3: Continued

| GO ID      | GO Term                                               | Count | PValue | Fold Enrichment |
|------------|-------------------------------------------------------|-------|--------|-----------------|
| GO:0051270 | regulation of cell motion                             | 8     | 0.0564 | 2.3267          |
| GO:0031667 | response to nutrient levels                           | 8     | 0.0616 | 2.2795          |
| GO:0051046 | regulation of secretion                               | 8     | 0.0685 | 2.2231          |
| GO:0048667 | cell morphogenesis involved in neuron differentiation | 8     | 0.0789 | 2.1486          |
| GO:0007517 | muscle organ development                              | 8     | 0.0820 | 2.1283          |
| GO:0009968 | negative regulation of signal transduction            | 8     | 0.0987 | 2.0320          |
| GO:0033273 | response to vitamin                                   | 7     | 0.0011 | 5.9535          |
| GO:0002237 | response to molecule of bacterial origin              | 7     | 0.0042 | 4.5689          |
| GO:0051348 | negative regulation of transferase activity           | 7     | 0.0072 | 4.0930          |
| GO:0040017 | positive regulation of locomotion                     | 7     | 0.0079 | 4.0095          |
| GO:0021700 | developmental maturation                              | 7     | 0.0092 | 3.8904          |
| GO:0042692 | muscle cell differentiation                           | 7     | 0.0208 | 3.2474          |
| GO:0045137 | development of primary sexual characteristics         | 7     | 0.0256 | 3.0939          |
| GO:0032583 | regulation of gene-specific transcription             | 7     | 0.0322 | 2.9323          |
| GO:0001525 | angiogenesis                                          | 7     | 0.0484 | 2.6549          |
| GO:0043062 | extracellular structure organization                  | 7     | 0.0704 | 2.4106          |
| GO:0030335 | positive regulation of cell migration                 | 6     | 0.0210 | 3.7842          |
| GO:0033673 | negative regulation of kinase activity                | 6     | 0.0219 | 3.7422          |
| GO:0001822 | kidney development                                    | 6     | 0.0280 | 3.5083          |
| GO:0051272 | positive regulation of cell motion                    | 6     | 0.0302 | 3.4367          |
| GO:0051329 | interphase of mitotic cell cycle                      | 6     | 0.0364 | 3.2699          |
| GO:0051325 | interphase                                            | 6     | 0.0404 | 3.1773          |
| GO:0001655 | urogenital system development                         | 6     | 0.0461 | 3.0618          |
| GO:0008406 | gonad development                                     | 6     | 0.0491 | 3.0071          |
| GO:0048608 | reproductive structure development                    | 6     | 0.0737 | 2.6730          |
| GO:0010038 | response to metal ion                                 | 6     | 0.0797 | 2.6108          |
| GO:0022604 | regulation of cell morphogenesis                      | 6     | 0.0838 | 2.5710          |
| GO:0016055 | Wnt receptor signaling pathway                        | 6     | 0.0881 | 2.5323          |
| GO:0006470 | protein amino acid dephosphorylation                  | 6     | 0.0881 | 2.5323          |
| GO:0002252 | immune effector process                               | 6     | 0.0902 | 2.5134          |
| GO:0051493 | regulation of cytoskeleton organization               | 6     | 0.0947 | 2.4764          |
| GO:0030855 | epithelial cell differentiation                       | 6     | 0.0969 | 2.4584          |
| GO:0048638 | regulation of developmental growth                    | 5     | 0.0095 | 5.9716          |
| GO:0015718 | monocarboxylic acid transport                         | 5     | 0.0118 | 5.6133          |

Table S3: Continued

| GO ID      | GO Term                                                            | Count | PValue | Fold Enrichment |
|------------|--------------------------------------------------------------------|-------|--------|-----------------|
| GO:0045444 | fat cell differentiation                                           | 5     | 0.0143 | 5.2955          |
| GO:0009636 | response to toxin                                                  | 5     | 0.0229 | 4.6010          |
| GO:0046545 | development of primary female sexual characteristics               | 5     | 0.0341 | 4.0676          |
| GO:0046660 | female sex differentiation                                         | 5     | 0.0341 | 4.0676          |
| GO:0031349 | positive regulation of defense response                            | 5     | 0.0406 | 3.8447          |
| GO:0048469 | cell maturation                                                    | 5     | 0.0442 | 3.7422          |
| GO:0032496 | response to lipopolysaccharide                                     | 5     | 0.0479 | 3.6450          |
| GO:0030278 | regulation of ossification                                         | 5     | 0.0498 | 3.5983          |
| GO:0009266 | response to temperature stimulus                                   | 5     | 0.0600 | 3.3815          |
| GO:0010638 | positive regulation of organelle organization                      | 5     | 0.0600 | 3.3815          |
| GO:0006469 | negative regulation of protein kinase activity                     | 5     | 0.0689 | 3.2260          |
| GO:0043523 | regulation of neuron apoptosis                                     | 5     | 0.0760 | 3.1185          |
| GO:0042058 | regulation of epidermal growth factor receptor signaling pathway   | 4     | 0.0075 | 9.7622          |
| GO:0032675 | regulation of interleukin-6 production                             | 4     | 0.0256 | 6.2370          |
| GO:0030072 | peptide hormone secretion                                          | 4     | 0.0315 | 5.7572          |
| GO:0002790 | peptide secretion                                                  | 4     | 0.0359 | 5.4764          |
| GO:0046879 | hormone secretion                                                  | 4     | 0.0453 | 4.9896          |
| GO:0006690 | icosanoid metabolic process                                        | 4     | 0.0505 | 4.7773          |
| GO:0032582 | negative regulation of gene-specific transcription                 | 4     | 0.0532 | 4.6777          |
| GO:0042593 | glucose homeostasis                                                | 4     | 0.0560 | 4.5823          |
| GO:0009914 | hormone transport                                                  | 4     | 0.0560 | 4.5823          |
| GO:0033500 | carbohydrate homeostasis                                           | 4     | 0.0560 | 4.5823          |
| GO:0032886 | regulation of microtubule-based process                            | 4     | 0.0560 | 4.5823          |
| GO:0033559 | unsaturated fatty acid metabolic process                           | 4     | 0.0617 | 4.4026          |
| GO:0008277 | regulation of G-protein coupled receptor protein signaling pathway | 4     | 0.0617 | 4.4026          |
| GO:0001889 | liver development                                                  | 4     | 0.0676 | 4.2364          |
| GO:0015833 | peptide transport                                                  | 4     | 0.0707 | 4.1580          |
| GO:0008037 | cell recognition                                                   | 4     | 0.0739 | 4.0824          |
| GO:0000082 | G1/S transition of mitotic cell cycle                              | 4     | 0.0771 | 4.0095          |
| GO:0045787 | positive regulation of cell cycle                                  | 4     | 0.0803 | 3.9391          |

Table S3: Continued

| GO ID                     | GO Term                                                          | Count | PValue | Fold Enrichment |
|---------------------------|------------------------------------------------------------------|-------|--------|-----------------|
| GO:0007179                | transforming growth factor beta receptor signaling pathway       | 4     | 0.0905 | 3.7422          |
| GO:0045410                | positive regulation of interleukin-6 biosynthetic process        | 3     | 0.0045 | 28.0664         |
| GO:0043584                | nose development                                                 | 3     | 0.0082 | 21.0498         |
| GO:0060324                | face development                                                 | 3     | 0.0155 | 15.3089         |
| GO:0030728                | ovulation                                                        | 3     | 0.0248 | 12.0285         |
| GO:0045408                | regulation of interleukin-6 biosynthetic process                 | 3     | 0.0248 | 12.0285         |
| GO:0060322                | head development                                                 | 3     | 0.0248 | 12.0285         |
| GO:0007176                | regulation of epidermal growth factor receptor activity          | 3     | 0.0283 | 11.2266         |
| GO:0048639                | positive regulation of developmental growth                      | 3     | 0.0319 | 10.5249         |
| GO:0010469                | regulation of receptor activity                                  | 3     | 0.0398 | 9.3555          |
| GO:0006693                | prostaglandin metabolic process                                  | 3     | 0.0440 | 8.8631          |
| GO:0006692                | prostanoid metabolic process                                     | 3     | 0.0440 | 8.8631          |
| GO:0030516                | regulation of axon extension                                     | 3     | 0.0483 | 8.4199          |
| GO:0051607                | defense response to virus                                        | 3     | 0.0483 | 8.4199          |
| GO:0009409                | response to cold                                                 | 3     | 0.0528 | 8.0190          |
| GO:0009395                | phospholipid catabolic process                                   | 3     | 0.0574 | 7.6545          |
| GO:0019827                | stem cell maintenance                                            | 3     | 0.0720 | 6.7359          |
| GO:0032768                | regulation of monooxygenase activity                             | 3     | 0.0720 | 6.7359          |
| GO:0048146                | positive regulation of fibroblast proliferation                  | 3     | 0.0771 | 6.4769          |
| GO:0048864                | stem cell development                                            | 3     | 0.0771 | 6.4769          |
| GO:0030073                | insulin secretion                                                | 3     | 0.0823 | 6.2370          |
| GO:0045740                | positive regulation of DNA replication                           | 3     | 0.0877 | 6.0142          |
| GO:0030199                | collagen fibril organization                                     | 3     | 0.0931 | 5.8068          |
| GO:0030500                | regulation of bone mineralization                                | 3     | 0.0986 | 5.6133          |
| GO:0021549                | cerebellum development                                           | 3     | 0.0986 | 5.6133          |
| GO:0050919                | negative chemotaxis                                              | 2     | 0.0856 | 22.4531         |
| GO:0051001                | negative regulation of nitric-oxide synthase activity            | 2     | 0.0856 | 22.4531         |
| GO:0045741                | positive regulation of epidermal growth factor receptor activity | 2     | 0.0856 | 22.4531         |
| <b>Cellular component</b> |                                                                  |       |        |                 |
| GO:0005886                | plasma membrane                                                  | 87    | 0.0040 | 1.2913          |

Table S3: Continued

| GO ID                     | GO Term                                                  | Count | PValue | Fold Enrichment |
|---------------------------|----------------------------------------------------------|-------|--------|-----------------|
| GO:0030141                | secretory granule                                        | 10    | 0.0049 | 3.1145          |
| GO:0000267                | cell fraction                                            | 32    | 0.0054 | 1.6565          |
| GO:0042995                | cell projection                                          | 23    | 0.0064 | 1.8499          |
| GO:0044459                | plasma membrane part                                     | 54    | 0.0108 | 1.3742          |
| GO:0031982                | vesicle                                                  | 21    | 0.0160 | 1.7571          |
| GO:0031091                | platelet alpha granule                                   | 5     | 0.0173 | 5.0055          |
| GO:0005856                | cytoskeleton                                             | 36    | 0.0193 | 1.4614          |
| GO:0031410                | cytoplasmic vesicle                                      | 20    | 0.0203 | 1.7465          |
| GO:0031988                | membrane-bounded vesicle                                 | 18    | 0.0249 | 1.7766          |
| GO:0016323                | basolateral plasma membrane                              | 9     | 0.0286 | 2.4855          |
| GO:0016023                | cytoplasmic membrane-bounded vesicle                     | 17    | 0.0364 | 1.7328          |
| GO:0015630                | microtubule cytoskeleton                                 | 17    | 0.0364 | 1.7360          |
| GO:0005626                | insoluble fraction                                       | 23    | 0.0429 | 1.5368          |
| GO:0060205                | cytoplasmic membrane-bounded vesicle lumen               | 4     | 0.0430 | 5.0965          |
| GO:0031983                | vesicle lumen                                            | 4     | 0.0480 | 4.8749          |
| GO:0005887                | integral to plasma membrane                              | 30    | 0.0486 | 1.4157          |
| GO:0030055                | cell-substrate junction                                  | 6     | 0.0493 | 3.0033          |
| GO:0015629                | actin cytoskeleton                                       | 10    | 0.0511 | 2.0841          |
| GO:0005624                | membrane fraction                                        | 22    | 0.0516 | 1.5245          |
| GO:0005625                | soluble fraction                                         | 11    | 0.0532 | 1.9702          |
| GO:0044421                | extracellular region part                                | 25    | 0.0558 | 1.4599          |
| GO:0005792                | microsome                                                | 9     | 0.0611 | 2.1289          |
| GO:0031226                | intrinsic to plasma membrane                             | 30    | 0.0614 | 1.3842          |
| GO:0042598                | vesicular fraction                                       | 9     | 0.0698 | 2.0678          |
| GO:0005773                | vacuole                                                  | 9     | 0.0806 | 2.0022          |
| GO:0043005                | neuron projection                                        | 11    | 0.0844 | 1.8031          |
| GO:0005853                | eukaryotic translation elongation factor 1 complex       | 2     | 0.0857 | 22.4246         |
| GO:0070161                | anchoring junction                                       | 7     | 0.0863 | 2.2816          |
| <b>Molecular Function</b> |                                                          |       |        |                 |
| GO:0019207                | kinase regulator activity                                | 9     | 0.0003 | 5.3465          |
| GO:0019887                | protein kinase regulator activity                        | 8     | 0.0006 | 5.4565          |
| GO:0047115                | trans-1,2-dihydrobenzene-1,2-diol dehydrogenase activity | 3     | 0.0019 | 41.4351         |
| GO:0031418                | L-ascorbic acid binding                                  | 4     | 0.0060 | 10.5232         |
| GO:0005509                | calcium ion binding                                      | 28    | 0.0082 | 1.6833          |

Table S3: Continued

| GO ID      | GO Term                                                                                      | Count | PValue | Fold Enrichment |
|------------|----------------------------------------------------------------------------------------------|-------|--------|-----------------|
| GO:0008028 | monocarboxylic acid transmembrane transporter activity                                       | 4     | 0.0088 | 9.2078          |
| GO:0019900 | kinase binding                                                                               | 9     | 0.0159 | 2.7778          |
| GO:0004860 | protein kinase inhibitor activity                                                            | 4     | 0.0267 | 6.1385          |
| GO:0005518 | collagen binding                                                                             | 4     | 0.0267 | 6.1385          |
| GO:0019210 | kinase inhibitor activity                                                                    | 4     | 0.0286 | 5.9726          |
| GO:0008656 | caspase activator activity                                                                   | 3     | 0.0329 | 10.3588         |
| GO:0047718 | indanol dehydrogenase activity                                                               | 2     | 0.0357 | 55.2468         |
| GO:0047026 | 3-alpha-hydroxysteroid dehydrogenase (A-specific) activity                                   | 2     | 0.0357 | 55.2468         |
| GO:0030291 | protein serine/threonine kinase inhibitor activity                                           | 3     | 0.0368 | 9.7494          |
| GO:0008092 | cytoskeletal protein binding                                                                 | 16    | 0.0395 | 1.7539          |
| GO:0016628 | oxidoreductase activity, acting on the CH-CH group of donors, NAD or NADP as acceptor        | 3     | 0.0452 | 8.7232          |
| GO:0050662 | coenzyme binding                                                                             | 8     | 0.0457 | 2.4418          |
| GO:0031406 | carboxylic acid binding                                                                      | 7     | 0.0461 | 2.6856          |
| GO:0051287 | NAD or NADH binding                                                                          | 4     | 0.0525 | 4.7019          |
| GO:0030145 | manganese ion binding                                                                        | 7     | 0.0601 | 2.5112          |
| GO:0016651 | oxidoreductase activity, acting on NADH or NADPH                                             | 5     | 0.0628 | 3.3281          |
| GO:0016504 | peptidase activator activity                                                                 | 3     | 0.0639 | 7.2061          |
| GO:0008289 | lipid binding                                                                                | 14    | 0.0641 | 1.7188          |
| GO:0032403 | protein complex binding                                                                      | 8     | 0.0646 | 2.2550          |
| GO:0003746 | translation elongation factor activity                                                       | 3     | 0.0689 | 6.9059          |
| GO:0005088 | Ras guanyl-nucleotide exchange factor activity                                               | 5     | 0.0745 | 3.1390          |
| GO:0004721 | phosphoprotein phosphatase activity                                                          | 7     | 0.0782 | 2.3438          |
| GO:0048037 | cofactor binding                                                                             | 9     | 0.0818 | 1.9969          |
| GO:0008047 | enzyme activator activity                                                                    | 11    | 0.0819 | 1.8141          |
| GO:0033764 | steroid dehydrogenase activity, acting on the CH-OH group of donors, NAD or NADP as acceptor | 3     | 0.0846 | 6.1385          |
| GO:0019842 | vitamin binding                                                                              | 6     | 0.0860 | 2.5499          |
| GO:0004862 | cAMP-dependent protein kinase inhibitor activity                                             | 2     | 0.0869 | 22.0987         |
| GO:0004791 | thioredoxin-disulfide reductase activity                                                     | 2     | 0.0869 | 22.0987         |

Table S3: Continued

| GO ID      | GO Term                                                                                                                                                                                           | Count | PValue | Fold Enrichment |
|------------|---------------------------------------------------------------------------------------------------------------------------------------------------------------------------------------------------|-------|--------|-----------------|
| GO:0005522 | profilin binding                                                                                                                                                                                  | 2     | 0.0869 | 22.0987         |
| GO:0015355 | secondary active monocarboxylate transmembrane transporter activity                                                                                                                               | 2     | 0.0869 | 22.0987         |
| GO:0030674 | protein binding, bridging                                                                                                                                                                         | 5     | 0.0898 | 2.9387          |
| GO:0005158 | insulin receptor binding                                                                                                                                                                          | 3     | 0.0901 | 5.9193          |
| GO:0016706 | oxidoreductase activity, acting on paired donors, with incorporation or reduction of molecular oxygen, 2-oxoglutarate as one donor, and incorporation of one atom each of oxygen into both donors | 3     | 0.0901 | 5.9193          |
| GO:0043028 | caspase regulator activity                                                                                                                                                                        | 3     | 0.0956 | 5.7152          |
